# Supplementary material
Source: Springer Nature journal article supplement (https://www.springermedizin.de/resource/supplementary/12985_2010_918_MOESM8_ESM.pdf/9608738)

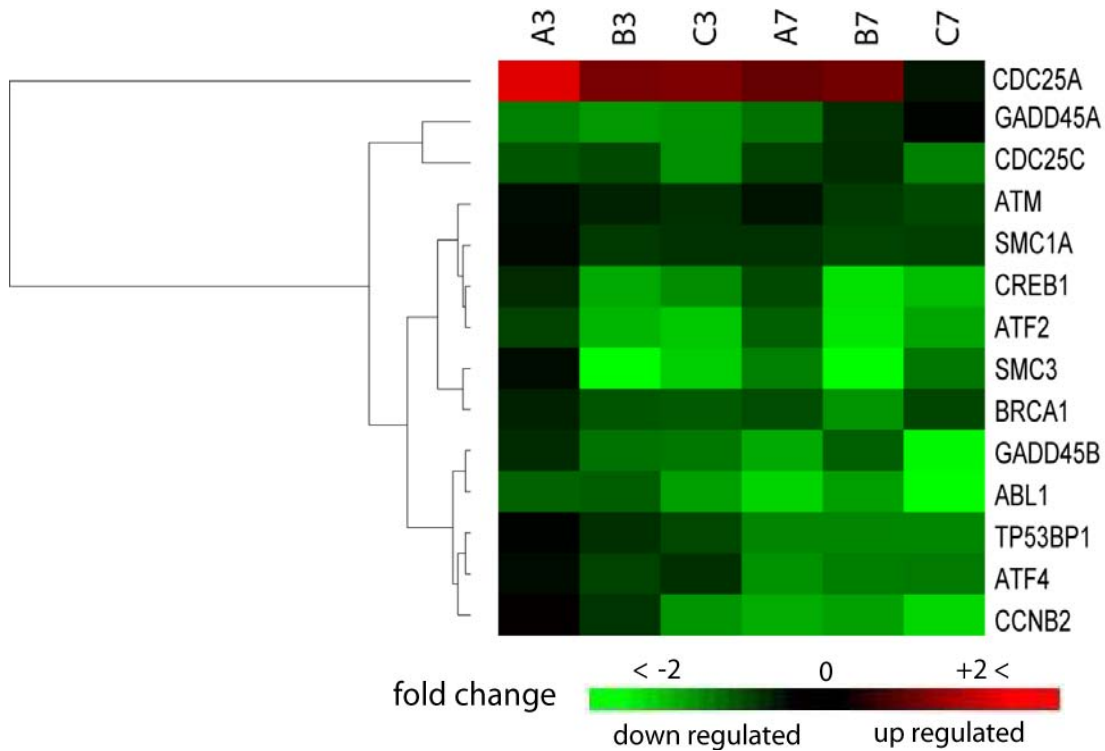

Supplement: MOESM8 [file 9608738]
